# Supplementary material
Source: Springer Nature journal article supplement (http://www.springermedizin.de/resource/supplementary/12877_2013_909_MOESM3_ESM.pdf/9440402)

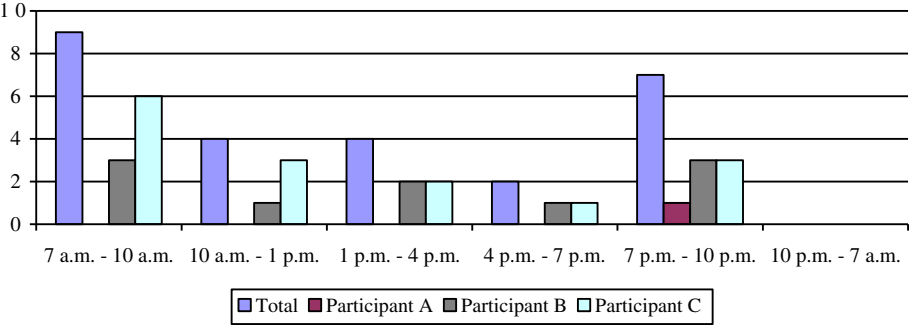

Supplement: MOESM3 [file 9440402]
